# Supplementary material for: Influence of Mn content on the morphology and electrochemical performance of LiNi1−x−yCoxMnyO2cathode materials
Source: Royal Society of Chemistry journal article supplement (doi:10.1039/b301468c), 2003-01-01
Supplement: b301468c.pdf [file b301468c.pdf]

Supplementary information

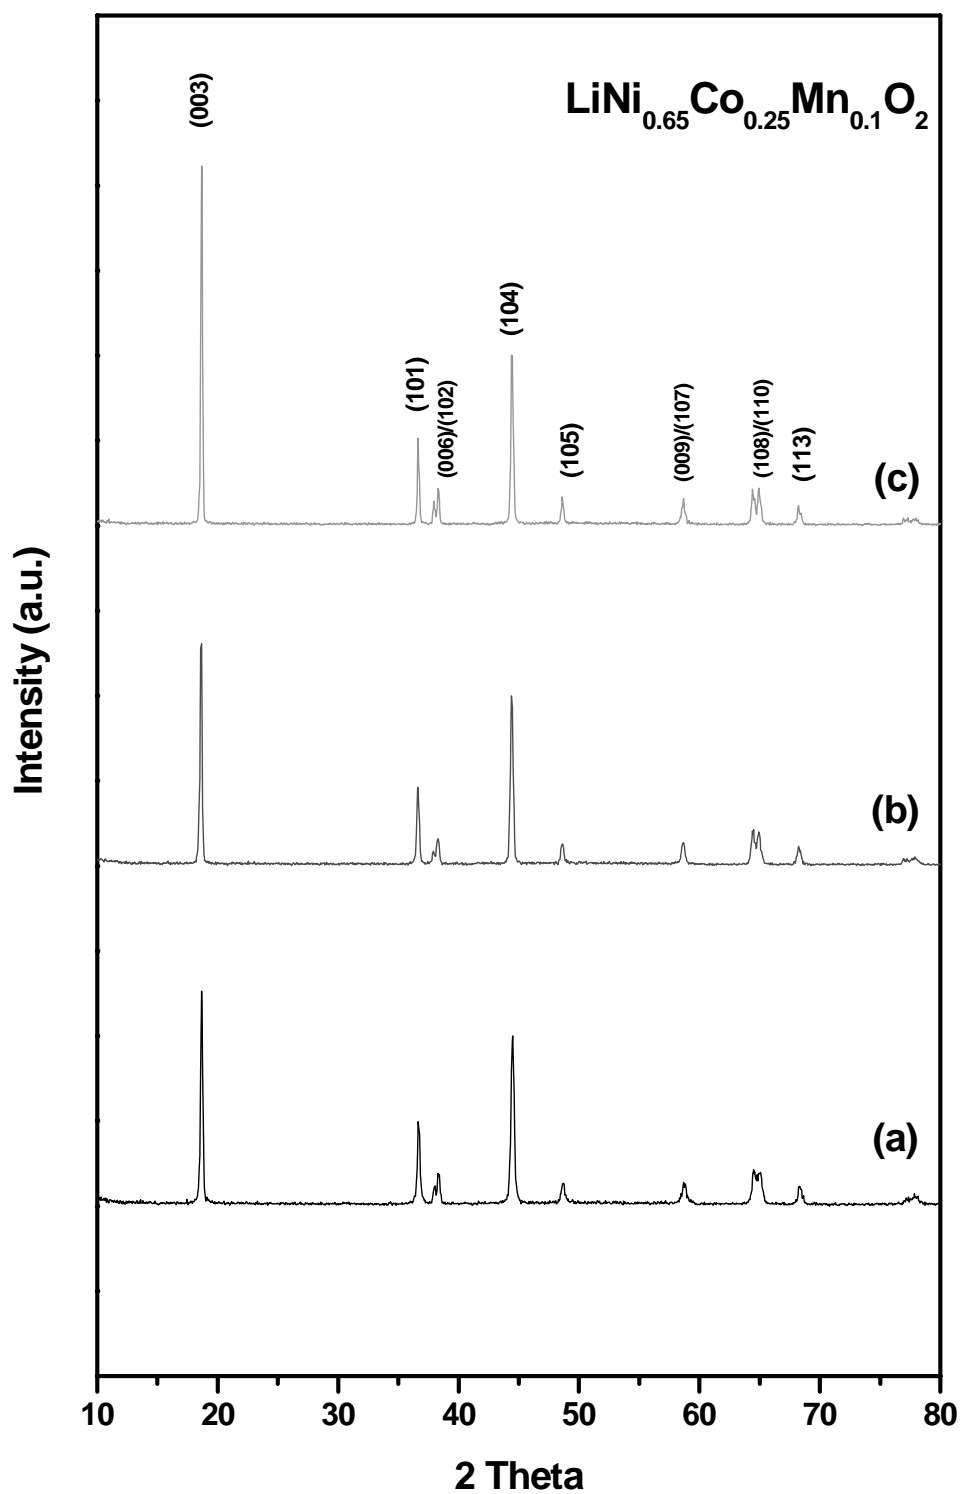

Powder XRD patterns of  $\text{LiNi}_{0.65}\text{Co}_{0.25}\text{Mn}_{0.1}\text{O}_2$  sintered at (a) 800, (b) 850 and (c) 900°C for 12 h.
